# Supplementary material
Source: PubMed Central journal article supplement (PMC2716456)

Biophysical Journal, Volume 96

**Supplementary Material**

**Model Development for the Viral Kcv Potassium Channel**

Sascha Tayefeh, Thomas Kloss, Michael Kreim, Manuela Gebhardt, Dirk Baumeister, Brigitte Hertel, Christian Richter, Harald Schwalbe, Anna Moroni, Gerhard Thiel, and Stefan M. Kast

## Model Development for the Viral Kcv Potassium Channel

Sascha Tayefeh,<sup>\*,†</sup> Thomas Kloss,<sup>\*</sup> Michael Kreim,<sup>\*,†</sup> Manuela Gebhardt,<sup>†</sup> Dirk Baumeister,<sup>†</sup> Brigitte Hertel,<sup>†</sup> Christian Richter,<sup>||</sup> Harald Schwalbe,<sup>||</sup> Anna Moroni,<sup>‡</sup> Gerhard Thiel,<sup>†</sup> and Stefan M. Kast<sup>\*</sup>

<sup>\*</sup>Eduard Zintl-Institut für Anorganische und Physikalische Chemie, <sup>†</sup>Institut für Botanik, Technische Universität Darmstadt, Germany, <sup>||</sup>Institut für Organische Chemie und Chemische Biologie, Zentrum für Biomolekulare Magnetische Resonanz, Johann-Wolfgang-Goethe-Universität Frankfurt, and <sup>‡</sup>Dipartimento di Biologia, CNR-IBF & INFN: Consiglio Nazionale della Ricerche-Istituto di Biofisica e Istituto Nazionale Fisica della Material, Unità di Milano Università, Milan, Italy

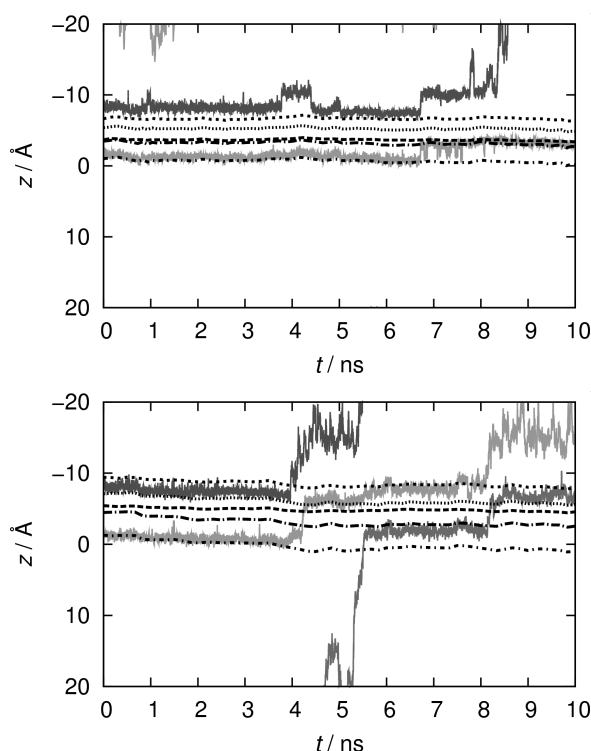

FIGURE S1  $z$  coordinates (measured along the channel axis) of  $K^+$  ions for simulations Kcv-HOM-K29<sub>prot</sub>-E3 and E4 with constant external field corresponding to +100 mV voltage. Both simulations were started with the last snapshot of the equilibrium run of Kcv-HOM-K29<sub>prot</sub> with flexible filter; time was reset to zero. Dashed/dotted lines show the positions of binding sites S0-S4 as in Fig. 11. Different shades of gray are used to distinguish ions.

### Experimental Chemical Shifts referenced to DSS (n.n = not assigned, empty: no atom)

|                 | <b>M</b><br><b>Met</b><br><b>1</b> | <b>L</b><br><b>Leu</b><br><b>2</b> | <b>V</b><br><b>Val</b><br><b>3</b> | <b>F</b><br><b>Phe</b><br><b>4</b> | <b>S</b><br><b>Ser</b><br><b>5</b> | <b>K</b><br><b>Lys</b><br><b>6</b> | <b>F</b><br><b>Phe</b><br><b>7</b> | <b>L</b><br><b>Leu</b><br><b>8</b> | <b>T</b><br><b>Thr</b><br><b>9</b> | <b>R</b><br><b>Arg</b><br><b>10</b> | <b>T</b><br><b>Thr</b><br><b>11</b> | <b>E</b><br><b>Glu</b><br><b>12</b> | <b>P</b><br><b>Pro</b><br><b>13</b> | <b>F</b><br><b>Phe</b><br><b>14</b> | <b>M</b><br><b>Met</b><br><b>15</b> | <b>I</b><br><b>Ile</b><br><b>16</b> |
|-----------------|------------------------------------|------------------------------------|------------------------------------|------------------------------------|------------------------------------|------------------------------------|------------------------------------|------------------------------------|------------------------------------|-------------------------------------|-------------------------------------|-------------------------------------|-------------------------------------|-------------------------------------|-------------------------------------|-------------------------------------|
| H <sup>N</sup>  |                                    | 8.62                               | 8.19                               | 8.42                               | 8.18                               | 8.26                               | 8.08                               | 7.95                               | 8.06                               | 8.34                                | 8.20                                | 8.23                                |                                     | 8.04                                | 8.08                                | 8.07                                |
| H <sup>α</sup>  | 4.12                               | 4.41                               | 4.07                               | 4.65                               | 4.37                               | 4.18                               | 4.63                               | 4.14                               | 4.30                               | 4.42                                | 4.31                                | 4.68                                | 4.35                                | 4.59                                | 4.63                                | 4.39                                |
| H <sup>β1</sup> | 2.15                               | 1.56                               | 1.95                               | 3.11                               | 3.82                               | 1.84                               | 3.18                               | 1.87                               | 4.20                               | 1.88                                | 4.17                                | 2.02                                | 2.19                                | 3.09                                | 2.03                                | 1.63                                |
| H <sup>β2</sup> | 2.15                               | 1.47                               |                                    | 2.99                               | 3.73                               | 1.84                               | 2.95                               | 1.87                               |                                    | 1.78                                |                                     | 1.82                                | 1.79                                | 3.09                                | 1.92                                |                                     |
| H <sup>γ1</sup> | 2.56                               | 1.19                               | 0.87                               |                                    | OH                                 | 1.23                               |                                    | 1.16                               | OH                                 | 1.61                                | OH                                  | 2.44                                | 1.94                                |                                     | 2.47                                | 1.58                                |
| H <sup>γ2</sup> | 2.56                               |                                    | 0.87                               |                                    |                                    | 1.23                               |                                    |                                    | 1.20                               | 1.61                                | 1.17                                | 2.44                                | 1.94                                |                                     | 2.47                                | 0.92                                |
| H <sup>δ1</sup> |                                    | 0.91                               |                                    | n.n.                               |                                    | 1.60                               | n.n.                               | 0.92                               |                                    | 3.17                                |                                     |                                     | 3.74                                | n.n.                                |                                     | 0.88                                |
| H <sup>δ2</sup> |                                    | 0.86                               |                                    | n.n.                               |                                    | 1.60                               | n.n.                               | 0.92                               |                                    | 3.17                                |                                     |                                     | 3.66                                | n.n.                                |                                     |                                     |
| H <sup>ε1</sup> | 2.11                               |                                    |                                    | n.n.                               |                                    | 2.92                               | n.n.                               |                                    |                                    | 7.15                                |                                     |                                     |                                     | n.n.                                | 2.08                                |                                     |
| H <sup>ε2</sup> |                                    |                                    |                                    | n.n.                               |                                    | 2.92                               | n.n.                               |                                    |                                    |                                     |                                     |                                     |                                     | n.n.                                |                                     |                                     |
| H <sup>ζ</sup>  |                                    |                                    |                                    | n.n.                               |                                    | 7.53                               | n.n.                               |                                    |                                    |                                     |                                     |                                     |                                     | n.n.                                |                                     |                                     |
| CO              | 171.81                             | 171.66                             | 176.27                             | 175.37                             | 175.18                             | 174.19                             | 175.19                             | 174.74                             | 176.90                             | 174.19                              | 175.89                              | 174.19                              |                                     | 176.17                              | 174.98                              | 176.35                              |
| C <sup>α</sup>  | 54.92                              | 55.16                              | 61.82                              | 57.50                              | 57.89                              | 56.67                              | 55.11                              | 61.45                              | 61.84                              | 56.27                               | 61.84                               | 53.56                               | 63.27                               | 57.44                               | 57.47                               | 55.24                               |
| C <sup>β</sup>  | 32.86                              | 42.46                              | 33.06                              | 39.75                              | 63.85                              | 28.73                              | 39.37                              | 39.23                              | 69.72                              | 31.20                               | 69.72                               | 28.68                               | 31.88                               | 39.35                               | 33.23                               | 26.92                               |
| C <sup>γ1</sup> | 30.62                              | 27.41                              | 21.01                              |                                    |                                    | 24.54                              |                                    | 27.42                              |                                    | 27.26                               |                                     | 32.73                               | 27.23                               |                                     | 31.79                               | 26.92                               |
| C <sup>γ2</sup> |                                    |                                    | 21.01                              |                                    |                                    |                                    |                                    |                                    | 21.86                              |                                     | 21.69                               |                                     |                                     |                                     |                                     | 17.78                               |
| C <sup>δ1</sup> |                                    | 23.62                              |                                    | n.n.                               |                                    | 28.98                              | n.n.                               | 24.74                              |                                    | 43.63                               |                                     | 180.31                              | 50.52                               | n.n.                                |                                     | 13.41                               |
| C <sup>δ2</sup> |                                    | 23.62                              |                                    | n.n.                               |                                    |                                    | n.n.                               | 24.74                              |                                    |                                     |                                     |                                     |                                     | n.n.                                |                                     |                                     |
| C <sup>ε1</sup> | 16.69                              |                                    |                                    | n.n.                               |                                    | 42.00                              | n.n.                               |                                    |                                    |                                     |                                     |                                     |                                     | n.n.                                | 16.83                               |                                     |
| C <sup>ε2</sup> |                                    |                                    |                                    | n.n.                               |                                    |                                    | n.n.                               |                                    |                                    |                                     |                                     |                                     |                                     | n.n.                                |                                     |                                     |
| C <sup>ζ</sup>  |                                    |                                    |                                    | n.n.                               |                                    |                                    | n.n.                               |                                    |                                    | 159.46                              |                                     |                                     |                                     | n.n.                                |                                     |                                     |
| N               | n.n                                | 126.86                             | 123.74                             | 126.13                             | 118.95                             | 124.52                             | 121.10                             | 125.39                             | 116.31                             | 124.46                              | 116.64                              | 124.42                              | n.n.                                | 120.17                              | 123.77                              | 124.50                              |
| N <sup>ε</sup>  |                                    |                                    |                                    |                                    |                                    | n.n                                |                                    |                                    |                                    | n.n.                                |                                     |                                     |                                     |                                     |                                     |                                     |

Chemical Shift perturbation ( $\Delta_{\text{exp}} - \Delta_{\text{statistical}}$ ), red:  $\text{H}^{\text{N}}$ , blue:  $\text{H}^{\alpha}$

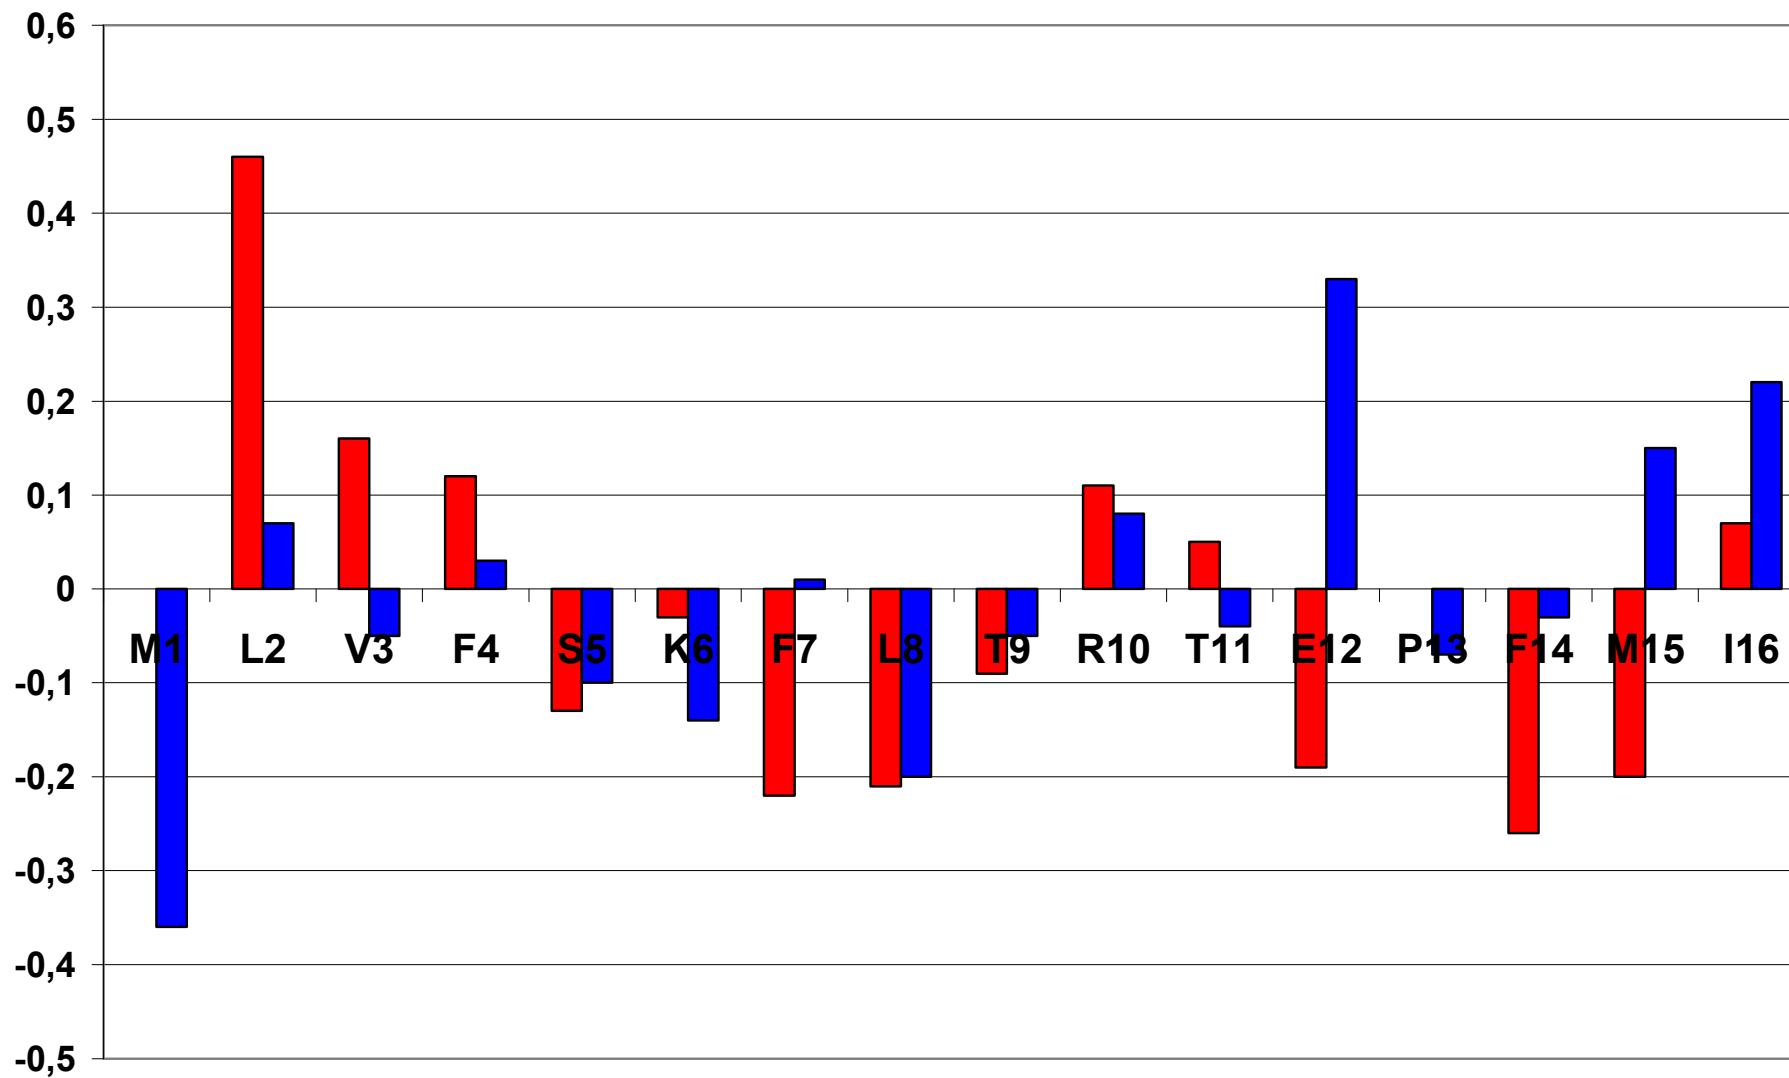

Supplement: mmc1.pdf [file mmc1.pdf]
